# Supplementary material for: Photochemical aging of atmospherically reactive organic compounds involving brown carbon at the air–aqueous interface
Source: Copernicus journal article supplement (doi:10.5194/acp-19-9887-2019), 2019-08-07
Supplement: Supplementary file 1 [file acp-19-9887-2019-supplement.pdf]

Supplement of Atmos. Chem. Phys., 19, 9887–9902, 2019  
<https://doi.org/10.5194/acp-19-9887-2019-supplement>  
© Author(s) 2019. This work is distributed under  
the Creative Commons Attribution 4.0 License.

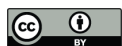

*Supplement of*

## **Photochemical aging of atmospherically reactive organic compounds involving brown carbon at the air–aqueous interface**

**Siyang Li et al.**

*Correspondence to:* Lin Du ([lindu@sdu.edu.cn](mailto:lindu@sdu.edu.cn))

The copyright of individual parts of the supplement might differ from the CC BY 4.0 License.

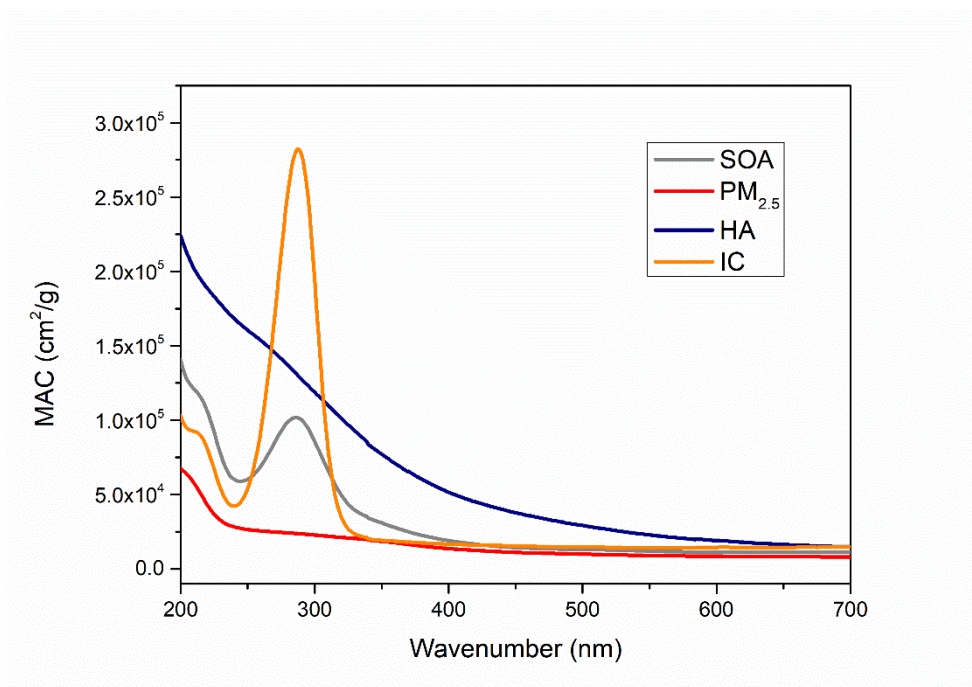

**Figure S1: Mass absorption coefficients (MAC) as a function of wavelength for IC, HA, PM<sub>2.5</sub> and SOA samples.**

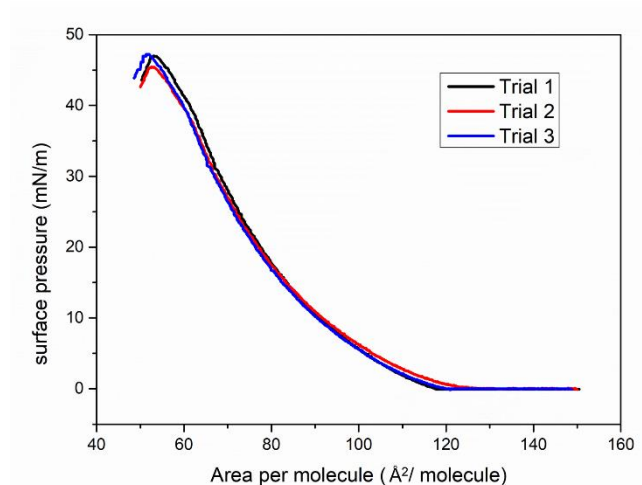

**Figure S2: Reproducibility of surface pressure-area isotherms of DOPC monolayers on the pure artificial seawater. Standard deviations of area per molecule and surface pressures are  $\pm 1$  Å<sup>2</sup>/molecule and  $\pm 2$  mN/m, respectively, for all the  $\pi$ -A isotherms measured in this study.**

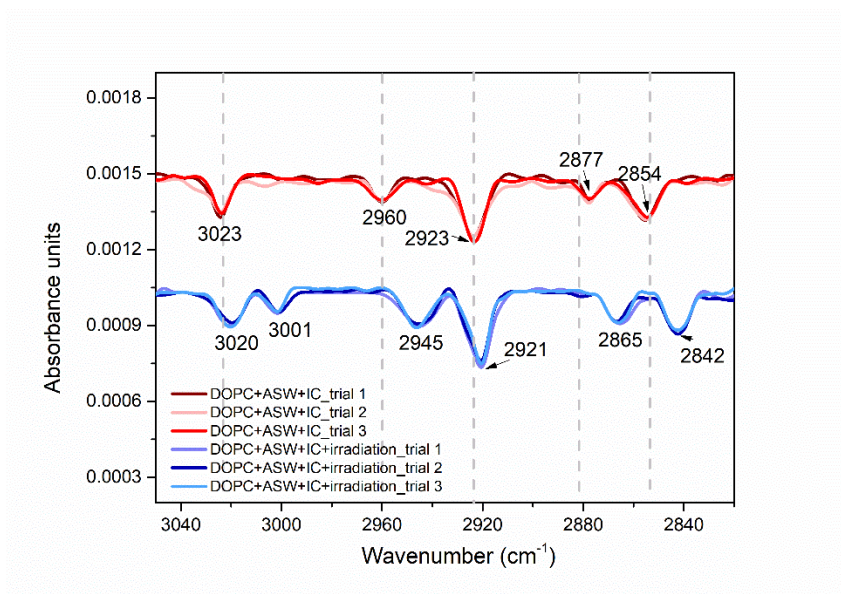

**Figure S3: Reproducibility of IRRAS spectra of irradiated and non-irradiated DOPC monolayers on the artificial seawater containing IC. The variability in the IRRAS peaks over the three trials was  $< 2 \text{ cm}^{-1}$ .**

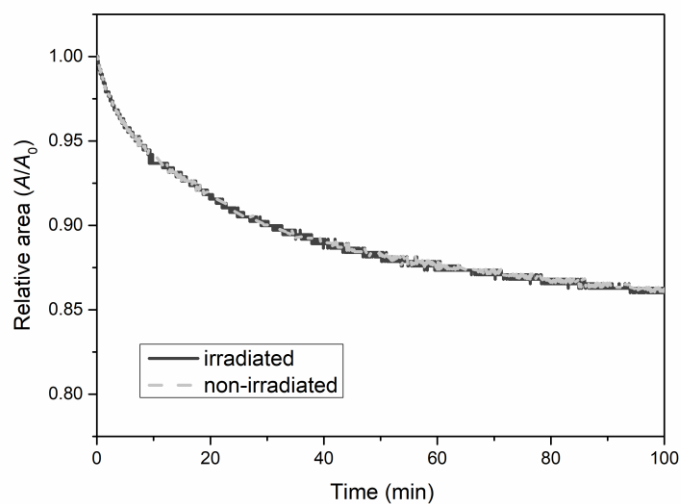

**Figure S4: Relative area ( $A/A_0$ ) relaxation curve of irradiated and non-irradiated DSPC monolayers on artificial seawater.  $A_0$  is the molecular area of monolayer at 25 mN/m.**

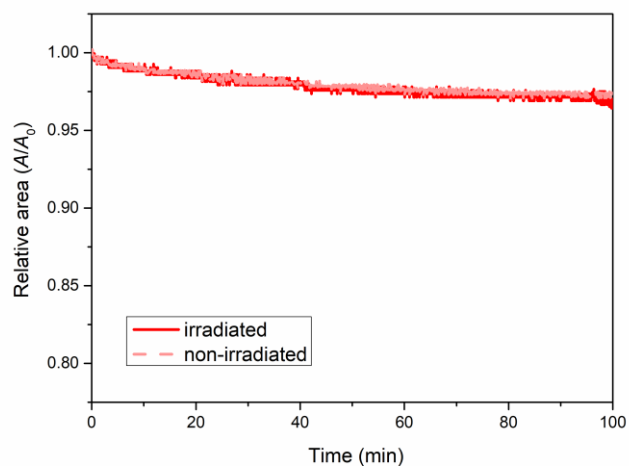

**Figure S5: Relative area ( $A/A_0$ ) relaxation curve of irradiated and non-irradiated DSPC monolayers on artificial seawater containing IC.  $A_0$  is the molecular area of monolayer at 25 mN/m.**

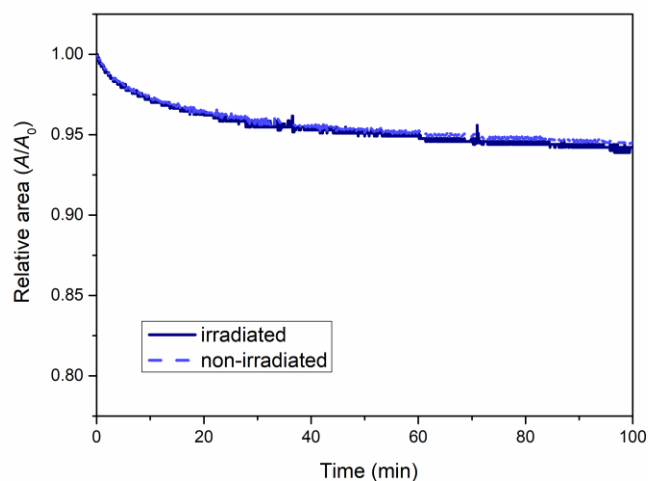

**Figure S6: Relative area ( $A/A_0$ ) relaxation curve of irradiated and non-irradiated DOPC monolayers on artificial seawater containing HA.  $A_0$  is the molecular area of monolayer at 25 mN/m.**

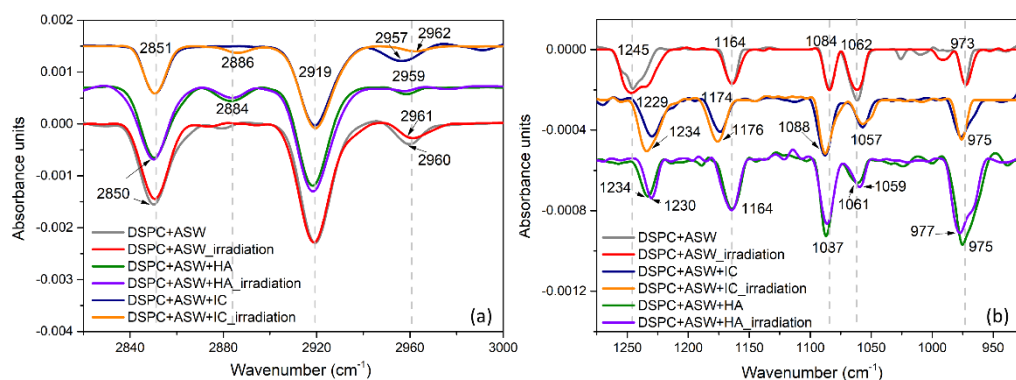

**Figure S7: PM-IRRAS spectra of DSPC monolayers in the range of (a) 2820-3000  $\text{cm}^{-1}$  and (b) 930-1275  $\text{cm}^{-1}$  on the subphases of artificial seawater containing IC or HA with and without exposure to irradiation. IRRAS spectra were recorded at 25 mN/m.**

**Table S1: Initial conditions used for chamber experiment.**

| Initial limonene (ppb) | Initial NO (ppb) | Initial NO <sub>x</sub> (ppb) | RH (%) | T (K) | H <sub>2</sub> O <sub>2</sub> (ppb) |
|------------------------|------------------|-------------------------------|--------|-------|-------------------------------------|
| 684                    | 164              | 206                           | 20     | 298   | 4324                                |
